# Supplementary material for: Molecular Dissection of the Essential Features of the Origin of Replication of the Second Vibrio cholerae Chromosome
Source: PubMed Central journal article supplement — mBio. 2015 Jul 28;6(4):e00973-15. doi: 10.1128/mBio.00973-15 (PMC4551981; doi:10.1128/mbio.00973-15), 2015-07-28
Supplement: mbo004152411sf3.pdf [file mbo004152411sf3.pdf]

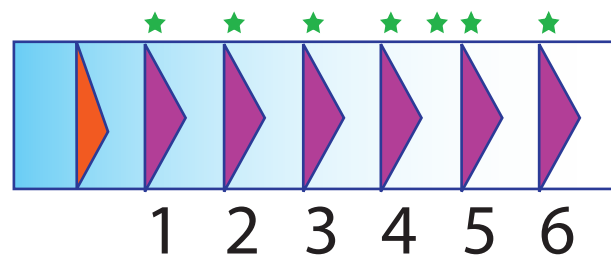

12-mer

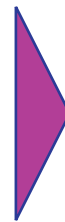

ATG<sup>★</sup>ATCATGCTT

- 1- TTG<sup>★</sup>ATCATGCTT    4- ATG<sup>★</sup>ATCATGCTT  
 2- TTG<sup>★</sup>ATCAT<sup>★</sup>TGAT    5- TTG<sup>★</sup>ATCATGGTT  
 3- ATG<sup>★</sup>ATCATGCTT    6- ATG<sup>★</sup>ATCATGCTT

Figure S3 - Sequences of individual 12-mers in *oriCII*
