# Supplementary material for: Molecular Dissection of the Essential Features of the Origin of Replication of the Second Vibrio cholerae Chromosome
Source: PubMed Central journal article supplement — mBio. 2015 Jul 28;6(4):e00973-15. doi: 10.1128/mBio.00973-15 (PMC4551981; doi:10.1128/mbio.00973-15), 2015-07-28
Supplement: mbo004152411st1.pdf [file mbo004152411st1.pdf]

| Plasmid name                             | Description                                                                  |
|------------------------------------------|------------------------------------------------------------------------------|
| pET-RctB wt                              | pET28b <i>rctB</i> wt                                                        |
| pGZ1119EH                                | ColD ori                                                                     |
| pBluescript II KS+                       | pUC ori                                                                      |
| pBS-12x6                                 | pBluescript II KS+ 12x6                                                      |
| pBS-inc 11                               | pBluescript II KS+ inc 11                                                    |
| pBS-inc 12                               | pBluescript II KS+ inc 12                                                    |
| pBS-11x6                                 | pBluescript II KS+ 11x6                                                      |
| pBS-11+1x6                               | pBluescript II KS+ 11+1x6                                                    |
| pBS-Rev-12x6                             | pBluescript II KS+ Rev-12x6                                                  |
| pBS-12x2                                 | pBluescript II KS+ 12x2                                                      |
| pBS-12x4                                 | pBluescript II KS+ 12x4                                                      |
| pBS-12-1                                 | pBluescript II KS+ 12-1                                                      |
| pBS-12-2                                 | pBluescript II KS+ 12-2                                                      |
| pBS-12-3                                 | pBluescript II KS+ 12-3                                                      |
| pBS-12-4                                 | pBluescript II KS+ 12-4                                                      |
| pBS-12-5                                 | pBluescript II KS+ 12-5                                                      |
| pBS-12-6                                 | pBluescript II KS+ 12-6                                                      |
| pBS-12-135                               | pBluescript II KS+ 12-135                                                    |
| pBS-12-246                               | pBluescript II KS+ 12-246                                                    |
| pBS-12-12456                             | pBluescript II KS+ 12-12456                                                  |
| pCR2.1-pseudo- <i>oriCII</i> -wt         | <i>oriCII</i> bps 520-887                                                    |
| pCR2.1-pseudo- <i>oriCII</i> -11x6       | <i>oriCII</i> wt where 6 12-mers replaced with 11-mers                       |
| pCR2.1-pseudo- <i>oriCII</i> -11+1x6     | <i>oriCII</i> wt where 6 12-mers replaced with 11-mers & last base of 12-mer |
| pCR2.1-pseudo- <i>oriCII</i> -Rev-12x6   | <i>oriCII</i> wt where entire 6 12-mer section reversed                      |
| pCR2.1-pseudo- <i>oriCII</i> -Delta-DnaA | <i>oriCII</i> wt where DnaA box is deleted                                   |
| pCR2.1-pseudo- <i>oriCII</i> -Rev-DnaA   | <i>oriCII</i> wt where DnaA box is reversed                                  |
| pCR2.1-pseudo- <i>oriCII</i> -12x2       | <i>oriCII</i> wt where 1st, 2nd, 5th, 6th 12-mers deleted                    |
| pCR2.1-pseudo- <i>oriCII</i> -12x4       | <i>oriCII</i> wt where 1st, 2nd 12-mers deleted                              |
| pCR2.1-pseudo- <i>oriCII</i> -12-1       | <i>oriCII</i> wt where GATC of 1st 12-mer changed to GTAC                    |
| pCR2.1-pseudo- <i>oriCII</i> -12-2       | <i>oriCII</i> wt where GATC of 2nd 12-mer changed to GTAC                    |
| pCR2.1-pseudo- <i>oriCII</i> -12-3       | <i>oriCII</i> wt where GATC of 3rd 12-mer changed to GTAC                    |
| pCR2.1-pseudo- <i>oriCII</i> -12-4       | <i>oriCII</i> wt where GATC of 4th 12-mer changed to GTAC                    |
| pCR2.1-pseudo- <i>oriCII</i> -12-5       | <i>oriCII</i> wt where GATC of 5th 12-mer changed to GTAC                    |
| pCR2.1-pseudo- <i>oriCII</i> -12-6       | <i>oriCII</i> wt where GATC of 6th 12-mer changed to GTAC                    |

|                                                 |                                                                                       |
|-------------------------------------------------|---------------------------------------------------------------------------------------|
| pCR2.1-pseudo- <i>oriCII</i> -12-135            | <i>oriCII</i> wt where GATC of 1st, 3rd, 5th 12-mers changed to GTAC                  |
| pCR2.1-pseudo- <i>oriCII</i> -12-246            | <i>oriCII</i> wt where GATC of 2nd, 4th, 6th 12-mers changed to GTAC                  |
| pCR2.1-pseudo- <i>oriCII</i> -12-12456          | <i>oriCII</i> wt where GATC of 1st, 2nd, 4th, 5th, 6th 12-mers changed to GTAC        |
| pCR2.1-pseudo- <i>oriCII</i> -1+5               | <i>oriCII</i> wt where GTACT inserted between 1st and 2nd 12-mer                      |
| pCR2.1-pseudo- <i>oriCII</i> -3+5               | <i>oriCII</i> wt where GTACT inserted between 3rd and 4th 12-mer                      |
| pCR2.1-pseudo- <i>oriCII</i> -6+5               | <i>oriCII</i> wt where GTACT inserted between 6th 12-mer and AT-rich region           |
| pCR2.1-pseudo- <i>oriCII</i> -1+10              | <i>oriCII</i> wt where GTACTGTACT inserted between 1st and 2nd 12-mer                 |
| pCR2.1-pseudo- <i>oriCII</i> -3+10              | <i>oriCII</i> wt where GTACTGTACT inserted between 3rd and 4th 12-mer                 |
| pCR2.1-pseudo- <i>oriCII</i> -6+10              | <i>oriCII</i> wt where GTACTGTACT inserted between 6th 12-mer and AT-rich region      |
| pCR2.1-pseudo- <i>oriCII</i> -1+21              | <i>oriCII</i> wt where GTACTGTACTGGACCTCCGGG inserted between 1st and 2nd 12-mer      |
| pCR2.1-pseudo- <i>oriCII</i> -3+21              | <i>oriCII</i> wt where GTACTGTACTGGACCTCCGGG inserted between 3rd and 4th 12-mer      |
| pCR2.1-pseudo- <i>oriCII</i> -DnaA+5            | <i>oriCII</i> wt where GTACT inserted between DnaA box and 1st 12-mer                 |
| pCR2.1-pseudo- <i>oriCII</i> -DnaA+10           | <i>oriCII</i> wt where GTACTGTACT inserted between DnaA box and 1st 12-mer            |
| pCR2.1-pseudo- <i>oriCII</i> -DnaA+21           | <i>oriCII</i> wt where GTACTGTACTGGACCTCCGGG inserted between DnaA box and 1st 12-mer |
| pCR2.1-pseudo- <i>oriCII</i> -Delta-AT          | <i>oriCII</i> wt where AT-rich region deleted                                         |
| pCR2.1-pseudo- <i>oriCII</i> - <i>oriCI</i> -AT | <i>oriCII</i> wt where AT-rich region replaced with <i>oriCI</i> AT-rich              |
| pCR2.1-pseudo- <i>oriCII</i> -Delta-29-mer      | <i>oriCII</i> wt where 29-mer and bases downstream up to RctB start codon deleted     |
| pCR2.1-pseudo- <i>oriCII</i> -AT GTAC           | <i>oriCII</i> wt where 3 GATC in AT-rich region changed to GTAC                       |
| pCR2.1-pseudo- <i>oriCII</i> -AT 1/2-1          |                                                                                       |
| pCR2.1-pseudo- <i>oriCII</i> -AT 1/2-2          |                                                                                       |
| pYB199-pseudo- <i>oriCII</i> -wt                |                                                                                       |
| pYB199-pseudo- <i>oriCII</i> -11x6              |                                                                                       |
| pYB199-pseudo- <i>oriCII</i> -11+1x6            |                                                                                       |
| pYB199-pseudo- <i>oriCII</i> -Rev-12x6          |                                                                                       |
| pYB199-pseudo- <i>oriCII</i> -Delta-DnaA        |                                                                                       |
| pYB199-pseudo- <i>oriCII</i> -Rev-DnaA          |                                                                                       |
| pYB199-pseudo- <i>oriCII</i> -12x2              |                                                                                       |
| pYB199-pseudo- <i>oriCII</i> -12x4              |                                                                                       |
| pYB199-pseudo- <i>oriCII</i> -12-1              |                                                                                       |
| pYB199-pseudo- <i>oriCII</i> -12-2              |                                                                                       |
| pYB199-pseudo- <i>oriCII</i> -12-3              |                                                                                       |
| pYB199-pseudo- <i>oriCII</i> -12-4              |                                                                                       |
| pYB199-pseudo- <i>oriCII</i> -12-5              |                                                                                       |
| pYB199-pseudo- <i>oriCII</i> -12-6              |                                                                                       |
| pYB199-pseudo- <i>oriCII</i> -12-135            |                                                                                       |

|                                   |                             |
|-----------------------------------|-----------------------------|
| pYB199-pseudo-oriCII-12-246       |                             |
| pYB199-pseudo-oriCII-12-12456     |                             |
| pYB199-pseudo-oriCII-1+5          |                             |
| pYB199-pseudo-oriCII-3+5          |                             |
| pYB199-pseudo-oriCII-6+5          |                             |
| pYB199-pseudo-oriCII-1+10         |                             |
| pYB199-pseudo-oriCII-3+10         |                             |
| pYB199-pseudo-oriCII-6+10         |                             |
| pYB199-pseudo-oriCII-1+21         |                             |
| pYB199-pseudo-oriCII-3+21         |                             |
| pYB199-pseudo-oriCII-DnaA+5       |                             |
| pYB199-pseudo-oriCII-DnaA+10      |                             |
| pYB199-pseudo-oriCII-DnaA+21      |                             |
| pYB199-pseudo-oriCII-Delta-AT     |                             |
| pYB199-pseudo-oriCII-oriCI-AT     |                             |
| pYB199-pseudo-oriCII-Delta-29-mer |                             |
| pYB199-pseudo-oriCII-AT GTAC      |                             |
| pYB199-pseudo-oriCII-AT 1/2-1     |                             |
| pYB199-pseudo-oriCII-AT 1/2-2     |                             |
| pYB190                            | pCRII                       |
| pYB199                            | pKD4 MCS*                   |
| pYB285                            | pGZ1119EH <i>rctB</i> wt    |
| pYB289                            | <i>oriCII rctB</i>          |
| pYB296                            | pGZ1119EH <i>rctB</i> 1-500 |
| pYB355                            | pET28b <i>rctB</i> 1-500    |

| Primer Name                       | Sequence (5'->3')                               |
|-----------------------------------|-------------------------------------------------|
| pseudo ori 5' Xma fuse            | CTCTAGAACTAGTGGATCCCCTCGAGGTCATCCACTCAGGT       |
| pseudo ori 3' Xho fuse            | GCTGGGTACCGGGCCCCCCCCCGGGGGTTAGATCCGTATC        |
| pseudo ori AT delta 3' Xho fuse   | GCTGGGTACCGGGCCCCCCCCCGGGGCCATTTCAGAAGC         |
| pseudo ori AT oriCI 3' Xho fuse   | GCTGGGTACCGGGCCCCCCCCCGGGGAAATGTTTCGTGATAAAGC   |
| pseudo ori DnaARev 5' Xma fuse    | CTCTAGAACTAGTGGATCCCCTCGAGGTCATCCACTACAGT       |
| pseudo ori PrctB dele 3' Xho fuse | GCTGGGTACCGGGCCCCCCCCCGGGGAGAATAAAGAAAAAGAGATC  |
| oriCII FP 3'-1                    | CGATTTTGTAGTTCTAATTTATTGTAATTAAGAGATTATTTTAAGCC |

|                            |                                                                    |
|----------------------------|--------------------------------------------------------------------|
| oriCII FP 5'-2 Stu         | TCGGAGGCCTGGCTTAAAATAATCTCTTTTAATTACAATAAATTAGAACTAAAAATCG         |
| oriCII FP 3'-2 Nde         | CTAGCATATGGATCAATCGTTTTTCTTCTGAGCTCATGG                            |
| inc-2 12mer 3' Nde         | TAACCATATGCAATGAATACTTGTGACTTGTGCTTCC                              |
| inc-2 11mer 5' Stu         | AAGGAGGCCTGGAAGCACAAGTCACAAGTATTCATTG                              |
| pseudo-ori mut 5' Xma fuse | CGGCCGCTCTAGAACTAGTGGATCCC                                         |
| pseudo-ori mut 3' Xho fuse | GCTGGGTACCGGGCCCCCCC                                               |
| kan 5' Xma fuse            | GGGATCCACTAGTTCTAGAGCGGCCGTCTAGAGAATAGGAACTTCGGAATAGGAACTTCAAGATCC |
| kan 3' Xho fuse            | GGGGGGGCCCGGTACCCAGC                                               |





|          |            |
|----------|------------|
| Amp, Kan | This study |
| Amp, Kan | 12         |
| Amp, Kan | 14         |
| Cam      | 39         |
| Kan      | 39         |
| Cam      | This study |
| Kan      | 14         |

| To construct                        | Method   |
|-------------------------------------|----------|
| pYB199-pseduo-oris, pBS-pseudo-oris | pcr, ita |
| pYB199-pseduo-oris                  | pcr, ita |
| pYB199-pseudo-oriCII-Delta-AT       | pcr, ita |
| pYB199-pseudo-oriCII-oriCI-AT       | pcr, ita |
| pYB199-pseduo-oriCII-Rev-DnaA       | pcr, ita |
| pYB199-pseudooriCII-Delta-29-mer    | pcr, ita |
| pBS-pseudo-oris                     |          |

|                                       |     |
|---------------------------------------|-----|
| pBS-inc-12                            |     |
| pBS-inc-11                            |     |
| pBS-inc-12                            |     |
| pBS-inc-11                            |     |
| <i>oriCII-min</i> -kan mutant library | pcr |
