# Supplementary material for: Molecular Dissection of the Essential Features of the Origin of Replication of the Second Vibrio cholerae Chromosome
Source: PubMed Central journal article supplement — mBio. 2015 Jul 28;6(4):e00973-15. doi: 10.1128/mBio.00973-15 (PMC4551981; doi:10.1128/mbio.00973-15), 2015-07-28
Supplement: mbo004152411st2.pdf [file mbo004152411st2.pdf]

| Table S2: <i>Vibrionaceae</i> species used in Comparative Seq |                                                          |           |
|---------------------------------------------------------------|----------------------------------------------------------|-----------|
| gb AJFN02000022.1                                             | <i>Vibrio cholerae</i> 2011EL-301 contig0022, who...     | 675 0.0   |
| gb CP003070.1                                                 | <i>Vibrio cholerae</i> O1 str. 2010EL-1786 chromosome... | 675 0.0   |
| gb CP001486.1                                                 | <i>Vibrio cholerae</i> MJ-1236 chromosome 2, complete... | 675 0.0   |
| gb CP001236.1                                                 | <i>Vibrio cholerae</i> O395 chromosome II, complete s... | 675 0.0   |
| gb CP001234.1                                                 | <i>Vibrio cholerae</i> M66-2 chromosome II, complete ... | 675 0.0   |
| gb CP000626.1                                                 | <i>Vibrio cholerae</i> O395 chromosome 1, complete ge... | 675 0.0   |
| gb AE003853.1                                                 | <i>Vibrio cholerae</i> O1 biovar eltor str. N16961 ch... | 675 0.0   |
| gb CP002556.1                                                 | <i>Vibrio cholerae</i> LMA3894-4 chromosome II, compl... | 652 0.0   |
| gb CP003331.1                                                 | <i>Vibrio cholerae</i> IEC224 chromosome II, complete... | 643 0.0   |
| gb CP006700.1                                                 | <i>Listonella anguillarum</i> M3 chromosome 2, comple... | 221 2e-56 |
| gb CP002285.1                                                 | <i>Vibrio anguillarum</i> 775 chromosome II, complete... | 221 2e-56 |
| gb CP002378.1                                                 | <i>Vibrio furnissii</i> NCTC 11218 chromosome 2, comp... | 210 3e-53 |
| gb CP003242.1                                                 | <i>Vibrio</i> sp. EJY3 chromosome 2, complete sequence   | 194 2e-48 |
| emb FM954973.2                                                | <i>Vibrio splendidus</i> LGP32 chromosome 2              | 179 5e-44 |
| gb AE016796.2                                                 | <i>Vibrio vulnificus</i> CMCP6 chromosome II, complet... | 178 2e-43 |
| gb CP007005.1                                                 | <i>Vibrio parahaemolyticus</i> UCM-V493 chromosome 2,... | 170 3e-41 |
| emb FO203527.1                                                | <i>Vibrio nigripulchritudo</i> str. SFn1 chromosome,...  | 170 3e-41 |
| gb AY309011.1                                                 | <i>Vibrio harveyi</i> RctB (rctB) gene, complete cds     | 170 3e-41 |
| gb CP006007.1                                                 | <i>Vibrio parahaemolyticus</i> O1:K33 str. CDC_K4557 ... | 165 1e-39 |
| gb CP003973.1                                                 | <i>Vibrio parahaemolyticus</i> BB22OP chromosome 2, c... | 165 1e-39 |
| gb CP006606.1                                                 | <i>Vibrio campbellii</i> ATCC BAA-1116 chromosome II,... | 161 1e-38 |
| gb CP006005.1                                                 | <i>Vibrio parahaemolyticus</i> O1:Kuk str. FDA_R31 ch... | 161 1e-38 |
| gb CP000790.1                                                 | <i>Vibrio harveyi</i> ATCC BAA-1116 chromosome II, co... | 161 1e-38 |
| dbj BA000032.2                                                | <i>Vibrio parahaemolyticus</i> RIMD 2210633 DNA, chr...  | 161 1e-38 |
| gb CP006719.1                                                 | <i>Vibrio alginolyticus</i> NBRC 15630 = ATCC 17749 c... | 158 2e-37 |
| gb CP002470.1                                                 | <i>Vibrio vulnificus</i> MO6-24/O chromosome II, comp... | 150 2e-35 |
| dbj BA000038.2                                                | <i>Vibrio vulnificus</i> YJ016 DNA, chromosome II, c...  | 150 2e-35 |
