# Supplementary figures and images for: Molecular Dissection of the Essential Features of the Origin of Replication of the Second Vibrio cholerae Chromosome
Source: PubMed Central journal article supplement — mBio. 2015 Jul 28;6(4):e00973-15. doi: 10.1128/mBio.00973-15 (PMC4551981; doi:10.1128/mbio.00973-15), 2015-07-28

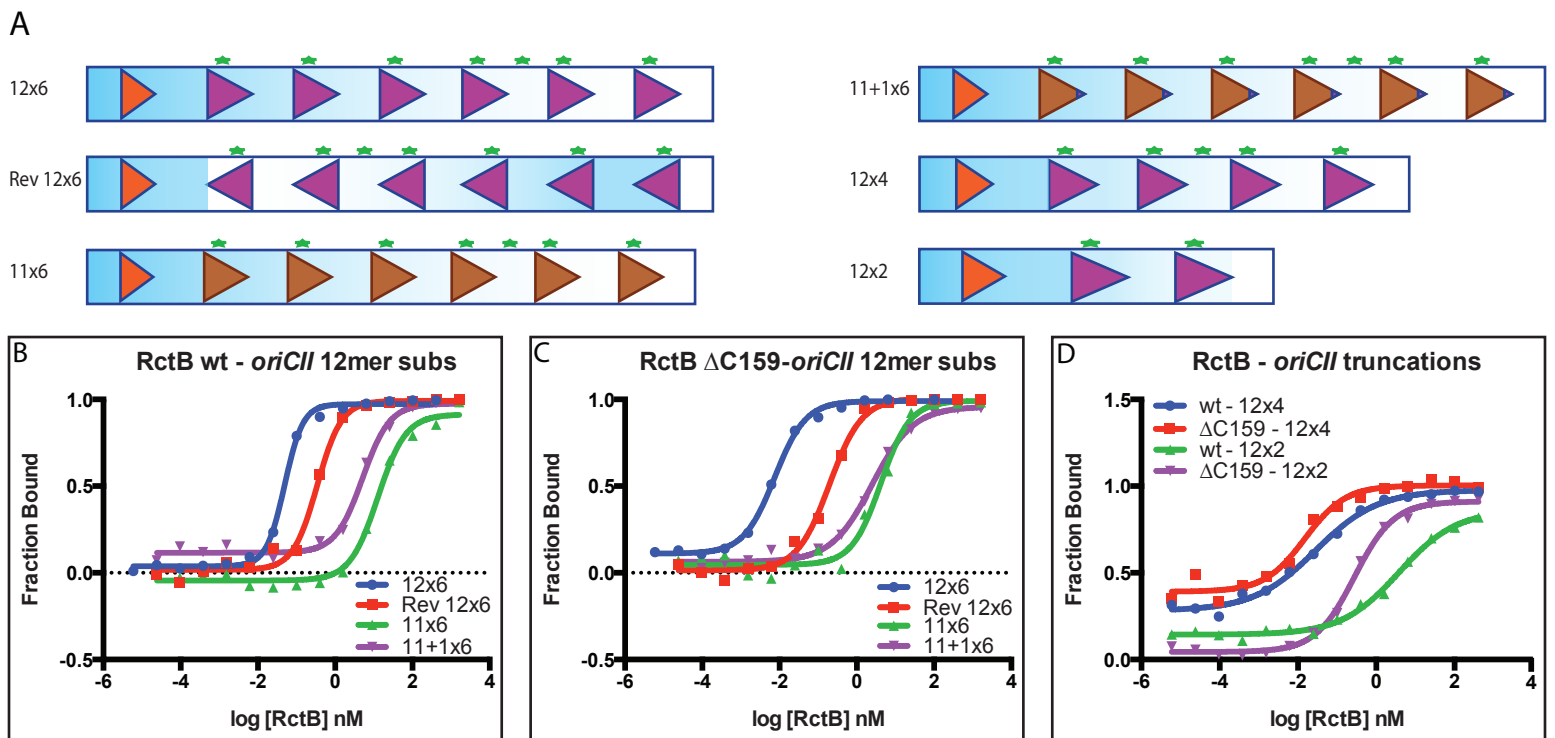

Figure S4 - 12-mer substitutions and deletions reduce RctB binding affinity and/or cooperativity

Supplement: mbo004152411sf4.pdf [file mbo004152411sf4.pdf]
